# Supplementary material
Source: PubMed Central journal article supplement (PMC5601342)
Supplement: AEM.01346-17_zam999118065s1.pdf [file AEM.01346-17_zam999118065s1.pdf]

## Supplementary Information

### Title:

US feral swine were exposed to both avian and swine influenza A viruses

### Running Title:

US feral swine exposed to influenza A viruses

### Author:

Brigitte E. Martin<sup>a</sup>, Hailiang Sun<sup>a</sup>, Margaret Carrel<sup>b</sup>, Fred L. Cunningham<sup>c</sup>, John A. Baroch<sup>d</sup>, Katie C. Hanson-Dorr<sup>c</sup>, Sean G. Young<sup>e</sup>, Brandon Schmit<sup>d</sup>, Jacqueline M. Nolting<sup>f</sup>, Kyoung-Jin Yoon<sup>g</sup>, Mark W Lutman<sup>h</sup>, Kerri Pedersen<sup>h</sup>, Kelly Lager<sup>i</sup>, Andrew S. Bowman<sup>f</sup>, Richard D. Slemons<sup>f</sup>, David R. Smith<sup>j</sup>, Thomas DeLiberto<sup>d\*</sup>, and Xiu-Feng Wan<sup>a\*</sup>

### Author affiliation:

<sup>a</sup>Department of Basic Sciences, College of Veterinary Medicine, Mississippi State University, Mississippi State, Mississippi, USA;

<sup>b</sup>Department of Geographical & Sustainability Sciences, University of Iowa, Iowa City, Iowa, USA;

<sup>c</sup>Mississippi Field Station, National Wildlife Research Center, Wildlife Services, Animal and Plant Health Inspection Service, US Department of Agriculture, Mississippi State, Mississippi, USA;

<sup>d</sup>National Wildlife Research Center, Wildlife Services, Animal and Plant Health Inspection Service, US Department of Agriculture, Fort Collins, Colorado, USA;

<sup>e</sup>Department of Environmental and Occupational Health, University of Arkansas for Medical Sciences, Little Rock, Arkansas, USA.

<sup>f</sup>Department of Veterinary Preventive Medicine, The Ohio State University, Columbus, Ohio, the USA;

<sup>g</sup>Department of Veterinary Diagnostic and Production Animal Medicine, Iowa State University, Ames, Iowa, USA;

<sup>h</sup>United States Department of Agriculture, Animal and Plant Health Inspection Service, Wildlife Services, 4101 LaPorte Avenue, Fort Collins, Colorado, USA;

<sup>i</sup>Virus and Prion Research Unit, National Animal Disease Center, U.S. Department of Agriculture, Agricultural Research Service, 1920 Dayton Avenue, Ames, IA, USA;

<sup>j</sup>Department of Pathobiology and Population Medicine, College of Veterinary Medicine, Mississippi State University, Mississippi State, Mississippi, USA.

### \*Corresponding authors:

Xiu-Feng Wan by email: [wan@cvm.msstate.edu](mailto:wan@cvm.msstate.edu) or [Thomas DeLiberto by Thomas.J.DeLiberto@aphis.usda.gov](mailto:Thomas.DeLiberto@aphis.usda.gov).

**Table S1.** Hemagglutination inhibition cross-reactivity among reference influenza A viruses and homologous antisera.

**Table S2.** Total number of influenza A virus-positive (N=406) and total number of feral swine serum samples collected during fiscal years 2010-2013<sup>a</sup> for month, age group, and sex.

| Month     | No. positive samples/total no. samples <sup>b</sup> (%) |                |                |                |                 |
|-----------|---------------------------------------------------------|----------------|----------------|----------------|-----------------|
|           | 2010                                                    | 2011           | 2012           | 2013           | Total           |
| January   | 13/220 (5.91)                                           | 16/373 (4.29)  | 4/80 (5.00)    | 10/188 (5.32)  | 43/861 (4.99)   |
| February  | 16/235 (6.81)                                           | 19/337 (5.64)  | 25/208 (12.02) | 9/274 (3.28)   | 69/1054 (6.55)  |
| March     | 14/250 (5.60)                                           | 18/378 (4.76)  | 8/245 (3.27)   | 3/364 (0.82)   | 43/1237 (3.48)  |
| April     | 20/162 (12.35)                                          | 7/253 (2.77)   | 1/159 (0.63)   | 16/218 (7.34)  | 44/792 (5.56)   |
| May       | 5/162 (3.09)                                            | 2/234 (0.85)   | 1/131 (0.76)   | 22/185 (11.89) | 30/712 (4.21)   |
| June      | 4/81 (4.94)                                             | 4/134 (2.99)   | 1/153 (0.65)   | 2/99 (2.02)    | 11/467 (2.36)   |
| July      | 9/133 (6.77)                                            | 5/184 (2.72)   | 0/86 (0.00)    | 0/101 (0.00)   | 14/504 (2.78)   |
| August    | 9/246 (3.66)                                            | 4/170 (2.35)   | 47/309 (15.21) | 2/201 (1.00)   | 62/926 (6.70)   |
| September | 1/57 (1.75)                                             | 0/112 (0.00)   | 18/280 (6.43)  | 0/67 (0.00)    | 19/516 (3.68)   |
| October   | 6/107 (5.61)                                            | 6/110 (5.45)   | 1/91 (1.10)    | 18/187 (9.63)  | 31/495 (6.26)   |
| November  | 6/80 (7.50)                                             | 9/56 (16.07)   | 1/26 (3.85)    | 4/83 (4.82)    | 20/245 (8.16)   |
| December  | 9/85 (10.59)                                            | 5/126 (3.97)   | 4/78 (5.13)    | 2/141 (1.42)   | 20/430 (4.65)   |
| Age group | 2010                                                    | 2011           | 2012           | 2013           | Total           |
| Juvenile  | 1/7 (14.29)                                             | 0/63 (0.00)    | 1/97 (1.03)    | 1/23 (4.35)    | 3/190 (1.58)    |
| Subadult  | 15/526 (2.85)                                           | 17/658 (2.58)  | 17/451 (3.77)  | 3/406 (0.74)   | 52/2041 (2.55)  |
| Adult     | 98/1281 (7.49)                                          | 78/1737 (4.49) | 93/1288 (7.22) | 83/1678 (4.95) | 350/5984 (5.85) |
| Unknown   | 0/0 (0.00)                                              | 0/9 (0.00)     | 0/10 (0.00)    | 1/1 (100.00)   | 1/24 (4.17)     |
| Sex       |                                                         | 47/1287        |                | 59/1101        | 233/4333        |
| Female    | 63/968 (6.51)                                           | (3.65)         | 64/977 (6.55)  | (5.36)         | (5.38)          |
| Male      | 46/843 (5.81)                                           | 48/1170 (4.10) | 47/858 (5.48)  | 29/1000 (2.90) | 173/3871 (4.47) |
| Unknown   | 0/7 (0.00)                                              | 0/10 (0.00)    | 0/11 (0.00)    | 0/7 (0.00)     | 0/35 (0.00)     |

|       |                 |                   |                    |                   |                    |
|-------|-----------------|-------------------|--------------------|-------------------|--------------------|
| Total | 112/1818 (6.16) | 95/2467<br>(3.85) | 111/1846<br>(6.01) | 88/2108<br>(4.17) | 406/8239<br>(4.93) |
|-------|-----------------|-------------------|--------------------|-------------------|--------------------|

<sup>a</sup> Fiscal years run from October 1st of one year through September 30th of the next year; the FY is named according to the second year.

<sup>b</sup> A total of 8,239 samples were tested using the IDEXX AI MultiS-Screen Ab Test (IDEXX, Westbrook, Maine, USA).

**Table S3.** Total number and number of influenza A virus–positive feral swine serum samples collected from each of 35 US states during fiscal years 2010–2013.<sup>a</sup>

| State          | Total no. samples/no. (%) positive <sup>b</sup> |
|----------------|-------------------------------------------------|
| Alabama        | 268/11 (4.10)                                   |
| Arkansas       | 437/7 (1.60)                                    |
| Arizona        | 100/1 (1.00)                                    |
| California     | 499/39 (7.82)                                   |
| Colorado       | 3/0 (0.00)                                      |
| Florida        | 916/17 (1.86)                                   |
| Georgia        | 553/12 (2.17)                                   |
| Hawaii         | 559/36 (6.44)                                   |
| Iowa           | 1/1 (100.00)                                    |
| Idaho          | 1/0 (0.00)                                      |
| Illinois       | 41/4 (9.76)                                     |
| Indiana        | 22/0 (0.00)                                     |
| Kansas         | 274/10 (3.65)                                   |
| Kentucky       | 41/0 (0.00)                                     |
| Louisiana      | 390/5 (1.28)                                    |
| Michigan       | 47/0 (0.00)                                     |
| Missouri       | 188/4 (2.13)                                    |
| Mississippi    | 440/7 (1.59)                                    |
| North Carolina | 211/34 (16.11)                                  |
| North Dakota   | 5/0 (0.00)                                      |
| New Hampshire  | 20/0 (0.00)                                     |
| New Jersey     | 8/0 (0.00)                                      |
| New Mexico     | 224/2 (0.89)                                    |
| Nevada         | 16/0 (0.00)                                     |
| New York       | 63/2 (3.17)                                     |

|                |                         |
|----------------|-------------------------|
| Ohio           | 45/0 (0.00)             |
| Oklahoma       | 735/27 (3.67)           |
| Oregon         | 94/1 (1.06)             |
| Pennsylvania   | 5/0 (0.00)              |
| South Carolina | 274/14 (5.11)           |
| Tennessee      | 127/4 (3.15)            |
| Texas          | 1,561/164 (10.51)       |
| Virginia       | 52/3 (5.77)             |
| Wisconsin      | 4/0 (0.00)              |
| West Virginia  | 15/1 (6.67)             |
| <b>Total</b>   | <b>8,239/406 (4.93)</b> |

<sup>a</sup> Fiscal years run from October 1st of one year through September 30th of the next year; the FY is named according to the second year.

<sup>b</sup> A total of 8,239 samples were tested using the IDEXX AI MultiS-Screen Ab Test (IDEXX, Westbrook, Maine, USA).

**Table S4.** Virus neutralization assay results for avian influenza–positive feral swine serum samples collected from swine in 35 US states, 2010–2013.

**Table S5.** Titration of virus loads in nasal washes from the feral swine infected with A/Mallard/WI/A00661712/20092009 (H3N2). Treatment feral swine were intranasally inoculated with  $10^6$  TCID<sub>50</sub> A/Mallard/WI/A00661712/20092009 (H3N2), meanwhile, control feral swine were intranasally inoculated with 1 mL PBS. Nasal wash were collected from 1 ~10 DPI. The virus shedding titers were detected in SPF eggs. Virus titer was expressed as log<sub>10</sub>EID<sub>50</sub>/mL.

| DPI | Treatment swine |    |    |    |      |    |    |       | Control swine |    |    |    |
|-----|-----------------|----|----|----|------|----|----|-------|---------------|----|----|----|
|     | 37              | 38 | 39 | 40 | 41   | 45 | 47 | 48    | 35            | 36 | 42 | 46 |
| 1   | ND              | ND | ND | ND | 2    | 1  | ND | 2     | ND            | ND | ND | ND |
| 2   | ND              | ND | ND | ND | 2    | ND | ND | 2.5   | ND            | ND | ND | ND |
| 3   | ND              | ND | ND | ND | ND   | ND | ND | ND    | ND            | ND | ND | ND |
| 4   | ND              | ND | ND | ND | 0.83 | ND | ND | 0.625 | ND            | ND | ND | ND |

|    |    |                |    |       |    |    |       |       |    |    |    |    |
|----|----|----------------|----|-------|----|----|-------|-------|----|----|----|----|
| 5  | ND | ND             | ND | 0.833 | ND | ND | 0.625 | 2.222 | ND | ND | ND | ND |
| 6  | ND | - <sup>a</sup> | ND | ND    | ND | -  | ND    | 2.25  | ND | -  | ND | ND |
| 7  | ND | -              | ND | ND    | ND | -  | ND    | ND    | ND | -  | ND | ND |
| 8  | ND | -              | -  | ND    | -  | -  | ND    | ND    | ND | -  | -  | ND |
| 9  | ND | -              | -  | ND    | -  | -  | ND    | ND    | ND | -  | -  | ND |
| 10 | ND | -              | -  | ND    | -  | -  | ND    | ND    | ND | -  | -  | ND |

<sup>a</sup>:- samples were not available

**Table S6.** Serological responses in the feral swine inoculated with A/mallard/WI/A00661712/2009 (H3N2). Treatment feral swine were intranasally inoculated with  $10^6$  TCID<sub>50</sub> A/Mallard/WI/A00661712/20092009 (aH3N2), meanwhile, control feral swine were intranasally inoculated with 1 mL PBS. Swine 38, swine 45 and swine 36 were necropsied at 5 DPI, swine 39, swine 41 and swine 42 were necropsied at 7 DPI. Sera were collected at 0, 10, 14, and 21 DPI, respectively. HI assay was conducted with 0.5% turkey red blood cell.

| DPI | Treatment swine |                |     |     |     |     |     |     | Control swine |     |     |     |
|-----|-----------------|----------------|-----|-----|-----|-----|-----|-----|---------------|-----|-----|-----|
|     | 37              | 38             | 39  | 40  | 41  | 45  | 47  | 48  | 35            | 36  | 42  | 46  |
| 0   | <10             | <10            | <10 | <10 | <10 | <10 | <10 | <10 | <10           | <10 | <10 | <10 |
| 21  | <10             | - <sup>a</sup> | -   | <10 | -   | -   | <10 | 80  | <10           | -   | -   | <10 |

<sup>a</sup>:- samples were not available

**Table S7.** Viral titers in different tissues of feral swine. Treatment feral swine were intranasally inoculated with  $10^6$  TCID<sub>50</sub> A/Mallard/WI/A00661712/2009 (H3N2), meanwhile, control feral swine were intranasally inoculated with 1 mL PBS. Swine 38, swine 45, and swine 36 were necropsied at 5 DPI, swine 39, swine 41, and swine 42 were necropsied at 7 DPI. Turbinate, trachea and lung of these swine were collected and virus titer in these tissues were detected in SPF eggs. Virus titers are expressed as log<sub>10</sub>EID<sub>50</sub>/gram/mL.

| Tissues   | Treatment swine |       |       |        | Control swine |       |
|-----------|-----------------|-------|-------|--------|---------------|-------|
|           | 5 DPI           |       | 7 DPI |        | 5 DPI         | 7 DPI |
|           | 38              | 45    | 39    | 41     | 36            | 42    |
| Turbinate | 2.5             | ND    | ND    | ND     | ND            | ND    |
| Trachea   | 2.5             | 1.333 | ND    | 0.667* | ND            | ND    |
| Lung      | 2.5             | 3.5   | ND    | ND     | ND            | ND    |

\*Below the detection limit.

**Table S8.** Serological responses in feral swine inoculated with A/mallard/Ohio/648/2002 (H6N2). Sera were collected at 0, 5, 7, and 21 DPI, respectively. HI assay was conducted with 0.5% turkey red blood cell.

| DPI | Treatment swine |     |     |     |
|-----|-----------------|-----|-----|-----|
|     | 116             | 117 | 121 | 122 |
| 0   | <10             | <10 | <10 | <10 |
| 21  | 20              | 80  | 20  | 40  |
